# Supplementary material
Source: PubMed Central journal article supplement (PMC4028091)
Supplement: Supp_Fig1.pdf [file Supp_Fig1.pdf]

## Supplementary Data

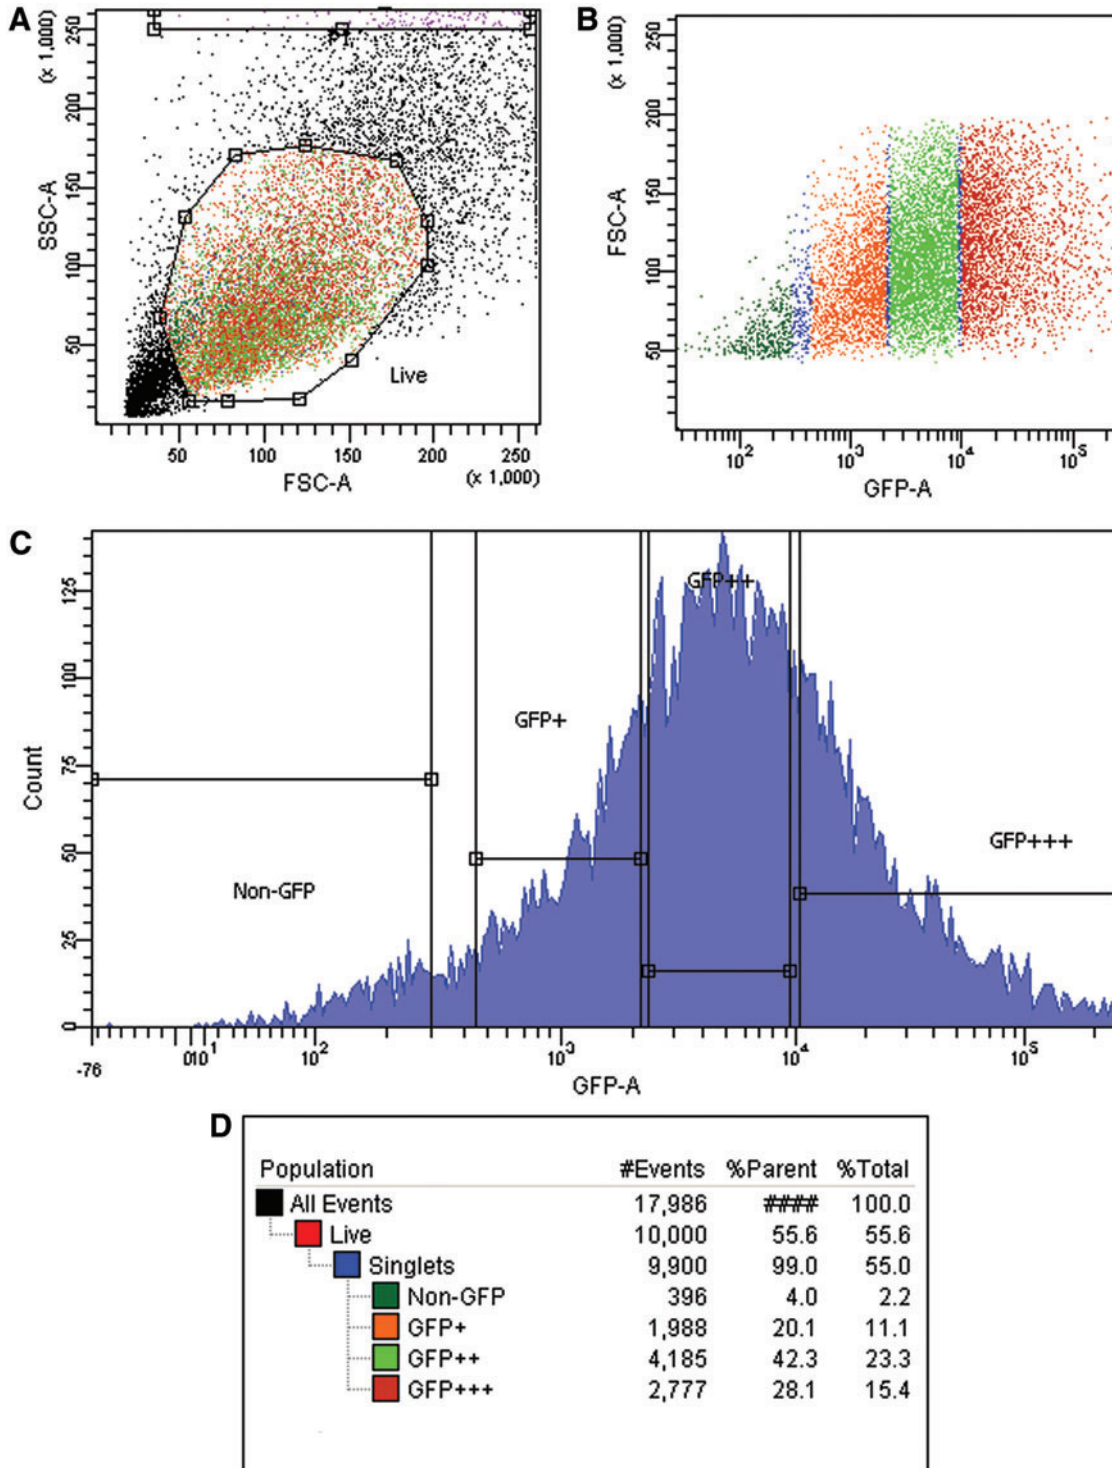

**SUPPLEMENTARY FIG. S1.** Fluorescence-activated cell sorting (FACS) after HEK293 cell infection with AAV2/1-eGFP-miRNA-Htt vector. **(A)** Flow cytometric scatter profile of HEK293 cells with eGFP. Forward light scatter A (FSC-A) represents relative cell size, area and SSC-A represents relative cell complexity, area with each dot representing one cell. **(B)** A fluorescence plot of eGFP fluorescence intensities of cells, with each color demarcating cells sorted as GFP<sup>-</sup>, GFP<sup>+</sup>, GFP<sup>++</sup>, or GFP<sup>+++</sup>, respectively. **(C)** FACS histogram of HEK293 cells expressing eGFP. **(D)** Table of cell counts after FACS sorting.
