# Supplementary material
Source: PubMed Central journal article supplement (PMC4028091)
Supplement: Supp_Fig2.pdf [file Supp_Fig2.pdf]

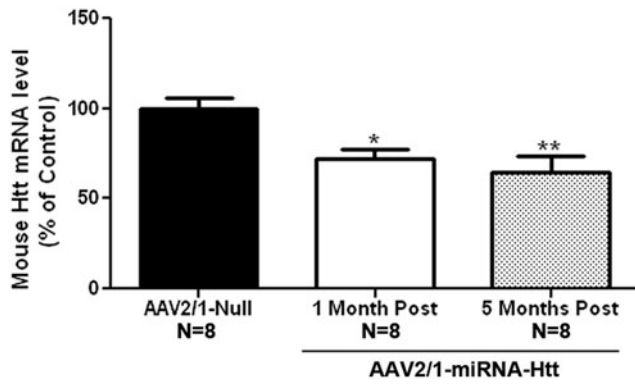

**SUPPLEMENTARY FIG. S2.** Mouse Htt mRNA reduction after intrastriatal injection of AAV2/1-miRNA-Htt into YAC128 mice. Shown is a quantitative PCR analysis evaluating endogenous mouse Htt mRNA levels in the striatum 1 and 5 months after injection of AAV2/1-miRNA-Htt or AAV2/1-null control vector. PPIA served as a normalization control gene. Values are given as means  $\pm$  SEM. \* $p < 0.05$ , \*\* $p < 0.01$ .
